# Supplementary material
Source: PubMed Central journal article supplement (PMC4795197)

## **Supplemental information file Summary**

**This file includes some Methods and the results concerning parent-of-origin analysis, as well as four figures including:**

**Figure S1. Example of a graphic representation of array-comparative genomic hybridization.**

**Figure S2. Delimitation of breakpoints for deletions at interstitial 19p13.3 region.**

**Figure S3. Representative example of complex genomic rearrangements found at the interstitial region 19p13.3.**

**Figure S4. Molecular analysis of a macrocephaly patient by means of array-CGH.**

**The file also includes three tables including:**

**Table S1. Patient 14 and other Patients with interstitial 19p13.3 rearrangements reported in DECIPHER and ISCA consortium databases.**

**Table S2. Predicted G-quadruplex sequences in the 13 patients with genomic rearrangements at 19p13.3 included herein using QGRS software.**

**Table S3. Overview of sequence motifs at the delineated breakpoints for non-recurrent 19p13.3 deletions.**

### **Methods:**

#### **1.- Additional laboratory studies:**

##### **CGH array**

The aCGH experiments were applied using different array platforms depending on the Center and the time: at Center 1 (INGEMM, Spain) KaryoArray® v3.0 (8x60K Agilent-based; Agilent Technologies, Santa Clara, CA, USA; see Figure 1 Supplemental data) was used<sup>23</sup>. Samples 1-7, 9, 12 and 13 were additionally analyzed by a customized high-density array (8x60K Agilent-based, within chromosome region chr19:1477536-6653608; hg19, NCBI37) to refine breakpoints. At Center 2 (Signature

Genomics, USA) aCGH was done by one of the following formats: SignatureChip version 4.0, (Signature Genomics), SignatureChipWG (Signature Genomics), 12x135K-SignatureChipOS version 2.0, custom designed by Signature Genomics and manufactured by Roche Nimblegen [Madison, WI, USA]), or 4x107K-SignatureChipOS version 4.0, custom designed by Signature Genomics and manufactured by Agilent, according to previously described methods<sup>24-26</sup>. Patient 8 was analyzed using Qchip\_v3.0 (Q-Genomics laboratory, Barcelona, Spain).

### **Fluorescence *In Situ* Hybridization**

FISH experiments were performed according to previously described methods<sup>27</sup>, and using BAC clones: RP11-454N6 (Bluegenome, Cambridge, UK) in patients 1, 3, and 4, and RP11-577E16 (patients 5 and 13); CTD-2622I13 (patients 7, 9, and 11); CTD-2537J8 (patient 10) and RP11-615O9 (patient 12). When available, parental samples were assayed by FISH to rule out chromosomal rearrangements in this region (see an example for patient 4; Figure 1c Supplemental data).

### **Parent-of-Origin Analysis with Short Tandem Repeats**

Parental testing was performed when parental DNA was available (patients 1-4) by segregation analysis of polymorphic microsatellite markers using fluorescently labeled primers (D19S1028; D19S591; D19S247; D19S424; D19S894; D19S216) in an ABI-3130XL genetic analyzer and Genemapper v4.0 software (<http://www.appliedbiosystems.com>). Determination of parent of origin for *de novo* deletions was done in patients 1-4, which showed that two were of maternal origin (patients 1 and 4) and one was of paternal origin (patient 3), while data from the parents of patient 2 were uninformative.

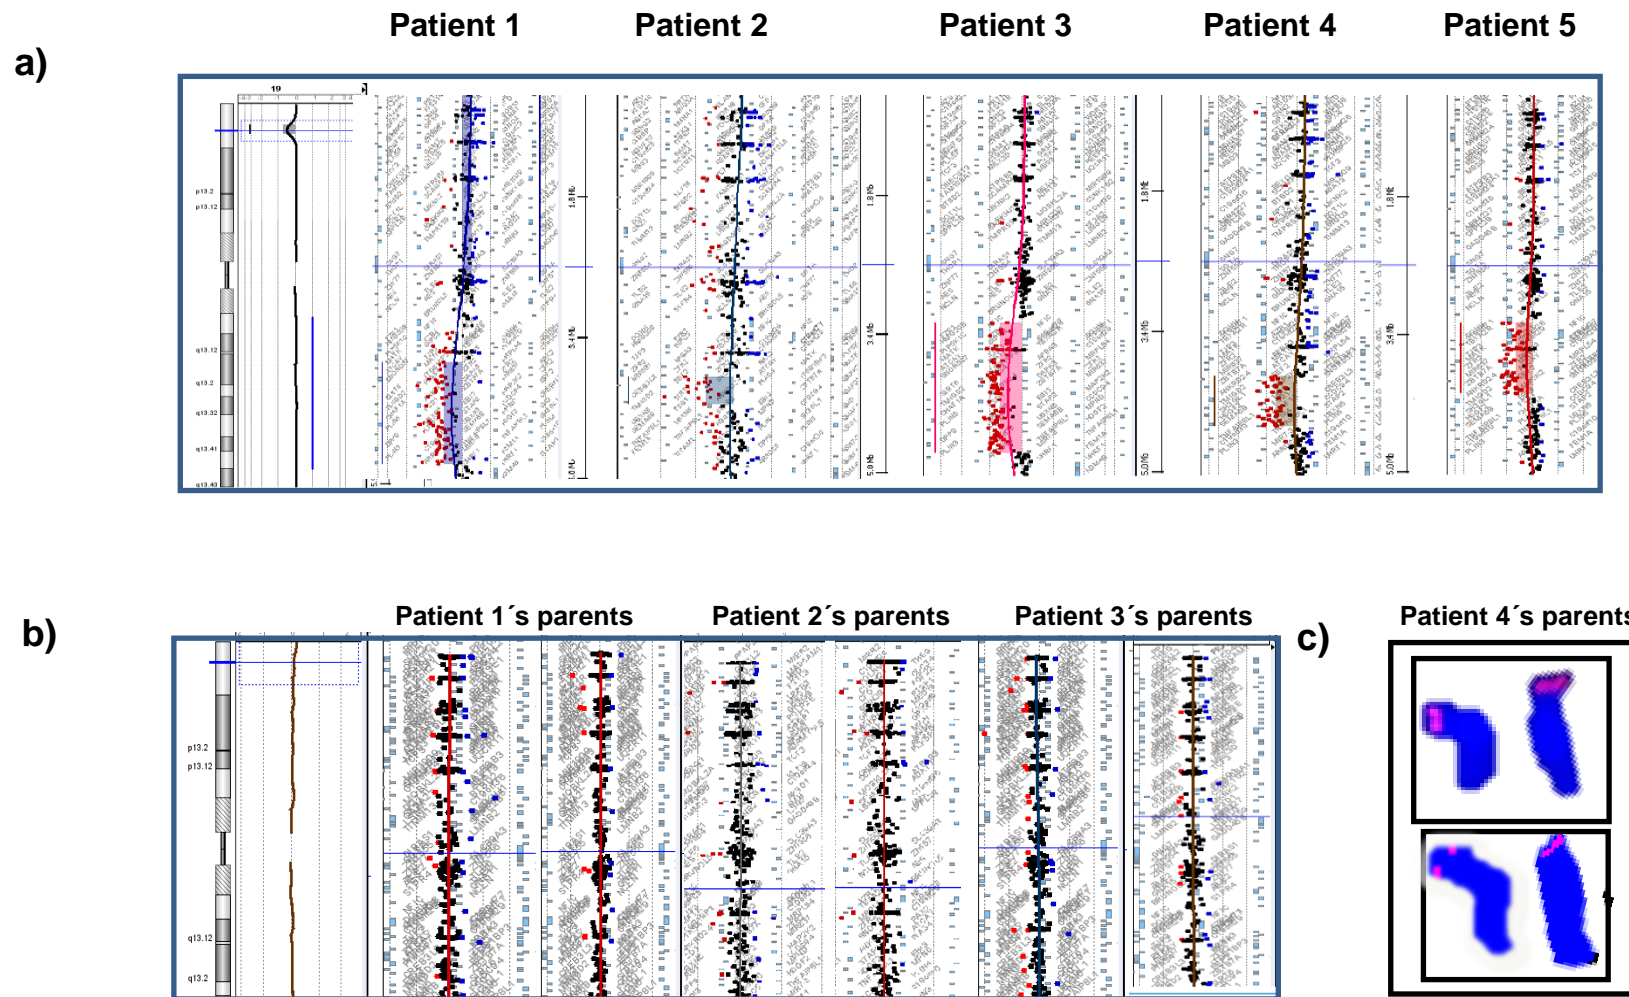

**Figure S1. Example of a graphic representation of array-comparative genomic hybridization.** a) Array-comparative genomic hybridization (aCGH) profiles from the three microdeletion patients (Patients 1–5). The array plots for Patients 1–5 show deletions at 19p13.3 chromosomal region ranging from a minimum of 0.306 Mb (Patient 2) to a maximum of 1.59 Mb (Patient 3). b ) Array-comparative genomic hybridization (aCGH) profiles from the parents of patient 1 and 3, showing no imbalance in the region of interest. c) FISH using RP11-454N6 (chr19:4,086,722-4,246,199 hg19, browser NCBI37) on a metaphase cell from Patient-4's parents, showing two signals in the region of interest.



**Table S1. Other patients with interstitial 19p13.3 rearrangements reported in DECIPHER and ISCA public databases and Patient 14 (continued)**

| <u>Patients</u>                   | <u>DECIPHER</u><br><u>259222</u>        | <u>DECIPHER</u><br><u>266691</u> | <u>DECIPHER</u><br><u>267370</u>              | <u>ISCA</u><br><u>nssv578795</u> | <u>ISCA</u><br><u>nssv582698</u> | <u>ISCA</u><br><u>nssv578788</u> | <u>ISCA</u><br><u>nssv577673</u> | <u>ISCA</u><br><u>nssv578797</u> | <u>ISCA</u><br><u>Nssv577674</u> | <u>DECIPHER</u><br><u>258067</u> | <u>DECIPHER</u><br><u>249485</u> |
|-----------------------------------|-----------------------------------------|----------------------------------|-----------------------------------------------|----------------------------------|----------------------------------|----------------------------------|----------------------------------|----------------------------------|----------------------------------|----------------------------------|----------------------------------|
| <b>Gender (M/F)</b>               | M                                       | M                                | M                                             |                                  |                                  |                                  |                                  |                                  |                                  | F                                |                                  |
| <b>Age (yr)/(at diagnosis)</b>    | 12                                      | 8                                | 25                                            |                                  | 13                               |                                  |                                  |                                  |                                  |                                  |                                  |
| <b>Type of genomic aberration</b> | Del                                     | dup                              | del                                           | dup                              | del                              | dup                              | Del                              | Dup                              | Del                              | del                              | del                              |
| <b>Growth and development</b>     |                                         |                                  |                                               |                                  |                                  |                                  |                                  |                                  |                                  |                                  |                                  |
| Psychomotor development delay     |                                         | +                                | +                                             | +                                | +                                | +                                |                                  |                                  | +                                |                                  | +                                |
| Intellectual disability           | +                                       | +                                | +                                             | +                                | +                                |                                  |                                  |                                  |                                  | mild                             | +                                |
| Speech delay                      |                                         |                                  |                                               |                                  |                                  |                                  |                                  |                                  |                                  |                                  | +                                |
| High or prominent forehead        |                                         |                                  |                                               |                                  |                                  |                                  |                                  |                                  |                                  |                                  | Narrow                           |
| <b>Face</b>                       | +                                       | +                                |                                               |                                  | +                                | ++                               |                                  |                                  | ++                               | +                                |                                  |
| Hypertelorism                     |                                         |                                  |                                               |                                  |                                  |                                  |                                  |                                  |                                  | +                                |                                  |
| Downslanting palpebral fissures   | +                                       | +                                |                                               |                                  |                                  |                                  |                                  |                                  |                                  |                                  |                                  |
| Short palpebral fissures          |                                         |                                  |                                               |                                  |                                  |                                  |                                  |                                  |                                  |                                  |                                  |
| Ptosis                            |                                         |                                  |                                               |                                  |                                  |                                  |                                  |                                  |                                  |                                  | +                                |
| Epicanthal Folds                  |                                         |                                  |                                               |                                  |                                  |                                  |                                  |                                  |                                  |                                  | +                                |
| Wide nasal bridge                 |                                         |                                  |                                               |                                  |                                  |                                  |                                  |                                  |                                  |                                  |                                  |
| Depressed nose and root           |                                         |                                  |                                               |                                  |                                  |                                  |                                  |                                  |                                  |                                  |                                  |
| Short philtrum                    |                                         | +                                |                                               |                                  |                                  |                                  |                                  |                                  |                                  |                                  | +                                |
| Thin upper lip                    |                                         |                                  |                                               |                                  |                                  |                                  |                                  |                                  |                                  |                                  | +                                |
| Ears abnormalities                |                                         |                                  |                                               |                                  |                                  |                                  |                                  |                                  |                                  | +                                |                                  |
| Macrocephaly/Microcephaly         | Macroceph                               | Normoceph                        | Normoceph.                                    | Microceph                        | Macroceph                        | Microceph                        | Macroceph                        | Rel. Microceph                   | Macroceph                        | Normoceph                        | Normo to Microceph               |
| <b>Neurology</b>                  |                                         | spasticity                       |                                               |                                  |                                  |                                  |                                  |                                  |                                  |                                  |                                  |
| Hypotonia                         |                                         |                                  |                                               |                                  |                                  |                                  |                                  |                                  |                                  |                                  |                                  |
| Behaviour                         | hyperactive                             |                                  |                                               |                                  |                                  |                                  |                                  |                                  |                                  |                                  | Aggressive/<br>autistic          |
| MRI                               |                                         |                                  |                                               |                                  |                                  |                                  |                                  |                                  |                                  |                                  |                                  |
| Hearing                           |                                         |                                  |                                               |                                  |                                  |                                  |                                  |                                  |                                  |                                  |                                  |
| <b>Others</b>                     | Fingers abnormal., recurrent infections | clinodactily                     | Diabetes, thyroid and somatotrope dysfunction |                                  |                                  | Intrauterine Growth retardation  |                                  |                                  |                                  | Absent testis                    |                                  |
| Cutis aplasia                     |                                         |                                  |                                               |                                  |                                  |                                  |                                  |                                  |                                  |                                  |                                  |
| Obesity                           |                                         |                                  |                                               |                                  | +                                |                                  |                                  |                                  |                                  |                                  |                                  |
| Proportionate short stature       |                                         |                                  |                                               | +                                |                                  | +                                |                                  |                                  |                                  |                                  | +                                |
| Urinary reflux                    |                                         |                                  |                                               |                                  |                                  |                                  |                                  |                                  |                                  | +                                | +                                |
| Gastroesophageal Reflux           |                                         |                                  |                                               |                                  |                                  |                                  |                                  |                                  |                                  | +                                |                                  |
| Feeding problems                  |                                         |                                  |                                               |                                  |                                  |                                  |                                  |                                  |                                  | +                                |                                  |
| Overgrowth Synd. testing          |                                         |                                  |                                               |                                  | +                                |                                  |                                  |                                  |                                  |                                  |                                  |
| Ophthalmologic abnormalities      |                                         |                                  |                                               |                                  |                                  |                                  |                                  |                                  |                                  |                                  |                                  |
| Inguinal Hernias                  |                                         |                                  |                                               |                                  |                                  |                                  |                                  |                                  |                                  |                                  |                                  |
| Sleeping disorders                |                                         |                                  |                                               |                                  |                                  |                                  |                                  |                                  |                                  |                                  |                                  |
| Heart disease                     |                                         |                                  | +                                             | +                                | -                                |                                  |                                  |                                  |                                  | +                                |                                  |

+, feature present; ++, severe feature, -, feature absent;

| Patient | Deletion/<br>duplication           | QRS MAPPER                                                                                                                                                                                                                                                                                                                                                                                                       |
|---------|------------------------------------|------------------------------------------------------------------------------------------------------------------------------------------------------------------------------------------------------------------------------------------------------------------------------------------------------------------------------------------------------------------------------------------------------------------|
| 01      | 19p13.3(332402-6-4870882)x1dn      | <u>GGCCGGTGGCTCACACCGG</u>                                                                                                                                                                                                                                                                                                                                                                                       |
| 02      | 19p13.3(3873600-4183343) x1dn      | (2)<br><u>GGTGGCTTGGGGCTGGTGGCCTGGAGG</u><br><u>GGCACACTGGAGAGCAAAGGTGG</u>                                                                                                                                                                                                                                                                                                                                      |
| 03*     | 19p13.3(323403-6-4823723) x1dn     | (9) distal<br><u>GGGAAAAGCGTTCCAAGAGTGCAGAGG</u><br><u>GGCAGGACCACCACATCTGGTGTGGTGG</u><br><u>GGAGGCCCTTGTGGCTGG</u><br><u>GGAGGGGGAGAGAGGGAGG</u><br><u>GGTTCTGTGTGCTTGAAGGACTTTGG</u><br><u>GGTGGAGCCATGGAGACCTGTGG</u><br><u>GGGGAGGGACAGGCTCTCAAGG</u><br><u>GGGGAAACTAAGGCACAGAAGG</u><br><u>GGCGCCTGGAGGTAGCTGG</u><br>Proximal<br><u>GGGAGAAAGGCGGCCGTCTGCAAGCTAAGG</u>                                   |
| 04      | 19p13.3(393278-5-4523183) x1dn     | (2)<br><u>GGTTTCACCATGCTGGCCAGGCTGG</u><br><u>GGATTCGCTTCATGGAGCCAGGGAGCAGG</u>                                                                                                                                                                                                                                                                                                                                  |
| 05      | 19p13.3(3279942-4168106) x1dn      | <u>GGGGTTTCACCATGTTGGTCAGG</u>                                                                                                                                                                                                                                                                                                                                                                                   |
| 06      | 19p13.3(378948-7-3988737) x1dn     | (2)<br><u>GGAGCCCCAGGCTCCGGCAGGAGG</u><br><u>GGAGGTGGAGG</u>                                                                                                                                                                                                                                                                                                                                                     |
| 07      | 19p13.3(3295068-4996928) x1dn      | (2)<br><u>GGGGAGGTGG</u><br><u>GGTGAGGGCCCTCCCATCCCAAGAGGGG</u>                                                                                                                                                                                                                                                                                                                                                  |
| 08*     | 19p13.3(248776-7-4882351) x3dn     |                                                                                                                                                                                                                                                                                                                                                                                                                  |
| 09.1*   | 19p13.3(319077-3-3448532) x1dn     | (4) distal<br><u>GGGGTGAGGCTGCTGGGCCTGGG</u><br><u>GGCCCCGGGAAGAGCTGCTGTGGGG</u><br><u>GGACGCTGGAGTCGGTCTGG</u><br><u>GGGAGGCTCCGGGG</u><br>(5) proximal<br><u>GGACGAGGGAAAGCAGAGCTGAGCTGG</u><br><u>GGGCTCGGGTACTCCAGGTGATGGG</u><br><u>GGGCCAGGAGCGAGGCCAGG</u><br><u>GGGTAAGAGGAGGCGGGTGTGAGG</u><br><u>GGCTTTGGGGAAGGTCCAGG</u>                                                                              |
| 09.2*   | 19p13.3(358593-0-4621011) x1dn     | (7) distal<br><u>GGTGTGCGCTTCCCGGGAGGCTCGG</u><br><u>GGCCGGGGAGGGAGG</u><br><u>GGCGCGGGCGG</u><br><u>GGCCCGGTGGGTGG</u><br><u>GGCCCGGAGGCCCGG</u><br><u>GGTAAGGAGCCCGACACCGG</u><br><u>GGGGTGAGGGGTAGGGAGCTTGG</u><br>(3) proximal<br><u>GGGGTCTTAGGGACCCCGG</u><br><u>GGCTGGAGTGCATAGTGTGGTCTCGG</u><br><u>GGGGTTTCACCATGTTGGCCAGTCTGG</u>                                                                      |
| 10*     | 19p13.3(232932-0-3808325)x3dn      | (6) distal<br><u>GGCCCGTCTTGGGGTCCAGCCTCGG</u><br><u>GGCCGGCGGTGCCGGGCTCGG</u><br><u>GGCTCTGTGGCCTTGAGCAGGGCGG</u><br><u>GGCGGAACGGGCACGG</u><br><u>GGGGGTGCGGTGGGG</u><br><u>GGCAGCATCCTGGAGCGGCCAGG</u><br>(3) proximal<br><u>GGACAGGCACCGGGGTGG</u> <sup>202</sup><br><u>GGCTCTGTGCCGGGGTGG</u><br><u>GGTGGGGCTGAGCCCTCCCTTCCGG</u>                                                                           |
| 11*     | 19p13.3(3979568-4131259)x1unkn own | (4) distal<br><u>GGGCAGGTGTCGGGGTGGCGTGGG</u><br><u>GGGGATGCAGGCGTGG</u><br><u>GGGGTAAGCGGCTCGAACAGG</u><br><u>GGGAAGGTGCTGGAAACTGG</u><br>(7) proximal<br><u>GGAAGGCTGAGGCTTGAGG</u><br><u>GGGGTTCCAAGAACCTGGCAACATAGG</u><br><u>GGCGGGCTGGCGGG</u><br><u>GGCTGAGATGGCGGATCACCAGG</u><br><u>GGTGGTGGTGG</u><br><u>GGAGGCTGAGGCAGG</u><br><u>GGCATGAACCCAGGAGGCGG</u>                                            |
| 12      | 19p13.3(3451211-4600362) x1dn      | (2)<br><u>GGTTCAGAGAGGCTTGTGTGGGGAGG</u><br><u>GGCCCTCAGGCTTGGAGTTAGG</u>                                                                                                                                                                                                                                                                                                                                        |
| 13*     | 19p13.3(341325-3-4194565)x1        | (3) distal<br><u>GGGATTACAGGTGTGTGCCACCACGGCTGG</u><br><u>GGTTTCACCATGTTGGCCAGGCTGG</u><br><u>GGGGCGTCTAATAGATGGGTAGG</u><br>(8) proximal<br><u>GGAGGAGGAAGTGGATTCATGG</u><br><u>GGTATATGGGATAGCTGGGATCTAGG</u><br><u>GGCCAAAAGGAGTAGTGGGGCTCAGG</u><br><u>GGCAACTAGGCATGGGG</u><br><u>GGCATGGTGGCAGGG</u><br><u>GGAAATAGCTGGGGATTCATGG</u><br><u>GGCATTGGGAAGAGGAGGG</u><br><u>GGACCCTGTAGAGTATCTGGGGACATGG</u> |

**Predicted G-quadruplex sequences in the 13 patients included herein using QGRS software.** Analysis was performed within 200 bp at the breakpoint site in Sanger solved cases and in 500 bp at both distal and proximal breakpoints when customized 19p13.3 aCGH is used (with asterisk).

**Table S3.**

| Motif name                                             | Motif sequence                       | Number of sequences                          |                                  | Number of sequences Verdin et al, 2013 |                                           |                                          | Frequency FOXL2 (48) |
|--------------------------------------------------------|--------------------------------------|----------------------------------------------|----------------------------------|----------------------------------------|-------------------------------------------|------------------------------------------|----------------------|
|                                                        |                                      | Observed breakpoint at 19p13.3 region (n=12) | Frequency 19p13.3 deletions (12) | Random control population (n=500)      | Frequency random control population (500) | Observed FOXL2 breakpoint regions (n=48) |                      |
| X-element E. coli                                      | GCTGGTGG                             | 1                                            | 0,08                             | 1                                      | 0,002                                     | 1                                        | 0,021                |
| Ade6-M26                                               | ATGACGT                              |                                              | -                                |                                        | -                                         | 1                                        | 0,021                |
| ARS consensus S. cerevisiae                            | WTTTATRITTTW                         |                                              | -                                | 4                                      | 0,008                                     | 1                                        | 0,021                |
| ARS consensus S. Pombe                                 | WRTTATTTAW                           |                                              | -                                | 3                                      | 0,006                                     | 2                                        | 0,042                |
| Consensus SAR 1                                        | AATAAAYAAA                           |                                              | -                                | 5                                      | 0,010                                     | 2                                        | 0,042                |
| Consensus SAR 2                                        | TTWTWTTWTT                           |                                              | -                                | 46                                     | 0,092                                     | 7                                        | 0,146                |
| Consensus SAR 3                                        | WADAWAYAWW                           |                                              | -                                | 109                                    | 0,218                                     | 14                                       | 0,292                |
| Consensus SAR 4                                        | TWWTDTTWWW                           |                                              | -                                | 120                                    | 0,240                                     | 10                                       | 0,208                |
| Deletion hotspot consensus                             | TGRRKM                               |                                              | -                                | 385                                    | 0,770                                     | 31                                       | 0,646                |
| DNA polymerase arrest site                             | WGGAG                                |                                              | -                                | 285                                    | 0,570                                     | 24                                       | 0,500                |
| DNA polymerase a frameshift hotspot 1                  | TCCCCC                               | 2                                            | 0,17                             | 32                                     | 0,064                                     | 1                                        | 0,021                |
| DNA polymerase a frameshift hotspot 2                  | CTGGCG                               |                                              | -                                | 7                                      | 0,014                                     |                                          | -                    |
| DNA polymerase b frameshift hotspot 1                  | ACCCWR                               |                                              | -                                | 138                                    | 0,276                                     | 17                                       | 0,354                |
| DNA polymerase a/b frameshift hotspot 1                | ACCCCA                               | 1                                            | 0,08                             | 42                                     | 0,084                                     | 7                                        | 0,146                |
| DNA polymerase a/b frameshift hotspot 2                | TGGNGT                               |                                              | -                                | 142                                    | 0,284                                     | 15                                       | 0,313                |
| D. Topoisomerase 2 consensus                           | GTNWAYATTNATNNR                      |                                              | -                                | 2                                      | 0,004                                     |                                          | -                    |
| Heptamer recombination signal                          | CACAGTG                              | 1                                            | 0,08                             | 23                                     | 0,046                                     |                                          | -                    |
| Human hypervariable minisatellites sequence 1          | GGAGGTGGGCAGGARG                     |                                              | -                                |                                        | -                                         |                                          | -                    |
| Human hypervariable minisatellites sequence 2          | AGAGGTGGGCAGGTGG                     |                                              | -                                |                                        | -                                         |                                          | -                    |
| Human minisatellites core sequence                     | GGGCAGGARG                           |                                              | -                                | 1                                      | 0,002                                     |                                          | -                    |
| Human replication origin consensus                     | WAWTTDDWWWDHWGWH<br>MAWTTDHWGWHMAWTT |                                              | -                                |                                        | -                                         |                                          | -                    |
| Human minisatellites conserved sequence/X-like element | GCWGGWGG                             |                                              | -                                | 17                                     | 0,034                                     |                                          | -                    |
| Ig heavy chain class switch repeat 1                   | GAGCT                                | 1                                            | 0,08                             | 116                                    | 0,232                                     |                                          | -                    |
| Ig heavy chain class switch repeat 2                   | GGGCT                                | 4                                            | 0,33                             | 99                                     | 0,198                                     |                                          | -                    |
| Ig heavy chain class switch repeat 3                   | GGGGT                                | 4                                            | 0,33                             | 87                                     | 0,174                                     |                                          | -                    |
| Ig heavy chain class switch repeat 4                   | TGGGG                                | 8                                            | 0,67                             | 134                                    | 0,268                                     |                                          | -                    |
| Ig heavy chain class switch repeat 5                   | TGAGC                                | 3                                            | 0,25                             | 130                                    | 0,260                                     |                                          | -                    |
| LTR-IS motif                                           | TGGAATCCCC                           |                                              | -                                |                                        | -                                         |                                          | -                    |

|                                               |                                    |   |      |     |       |  |   |
|-----------------------------------------------|------------------------------------|---|------|-----|-------|--|---|
| Mariner transposon-like element               | GAAAATGAAGCTATTTACC<br>CAGGA       |   | -    |     | -     |  | - |
| Murine MHC recombination hotspot              | CAGRCAGR                           |   | -    | 25  | 0,050 |  | - |
| Murine parvovirus recombination hotspot       | CTWTTY                             |   | -    | 239 | 0,478 |  | - |
| Nonamer recombination signal                  | ACAAAAACC                          |   | -    | 2   | 0,004 |  | - |
| Pur-binding site                              | GGNNGAGGGAGARRRR                   |   | -    |     | -     |  | - |
| Recombination hotspot                         | CCNCCNTNCCNC                       |   | -    | 10  | 0,020 |  | - |
| Retrotransposon                               | TCATACACCACGCAGGGG<br>TAGAGGACT    |   | -    |     | -     |  | - |
| Translin-binding site 1                       | ATGCAG                             | 2 | 0,17 | 34  | 0,068 |  | - |
| Translin-binding site 2                       | GCCCWSSW                           |   | -    | 47  | 0,094 |  | - |
| Vaccinia topoisomerase I consensus            | YCCTT                              |   | -    | 257 | 0,514 |  | - |
| Vaccinia topoisomerase II consensus           | RNYNNCNGYNGKTNINY                  |   | -    | 2   | 0,004 |  | - |
| XY32 homopurine-pyrimidine H-palindrome motif | AAGGGAGAARGGGTATAG<br>GGRAAGAGGGAA |   | -    |     | -     |  | - |

**Overview of sequence motifs at the delineated breakpoints for non-recurrent 19p13.3 deletions.** Analysis was performed within 100 bp at the breakpoint sites in Sanger solved cases; patients 1, 2, 4-7 and 12, using BLAST, SEQUENCHER, UCSC Genome browser and Repeat Masquer analysis softwares. Comparative data for FOXL2 locus were extracted partially from Verdin et al., 2013 (see reference 47).



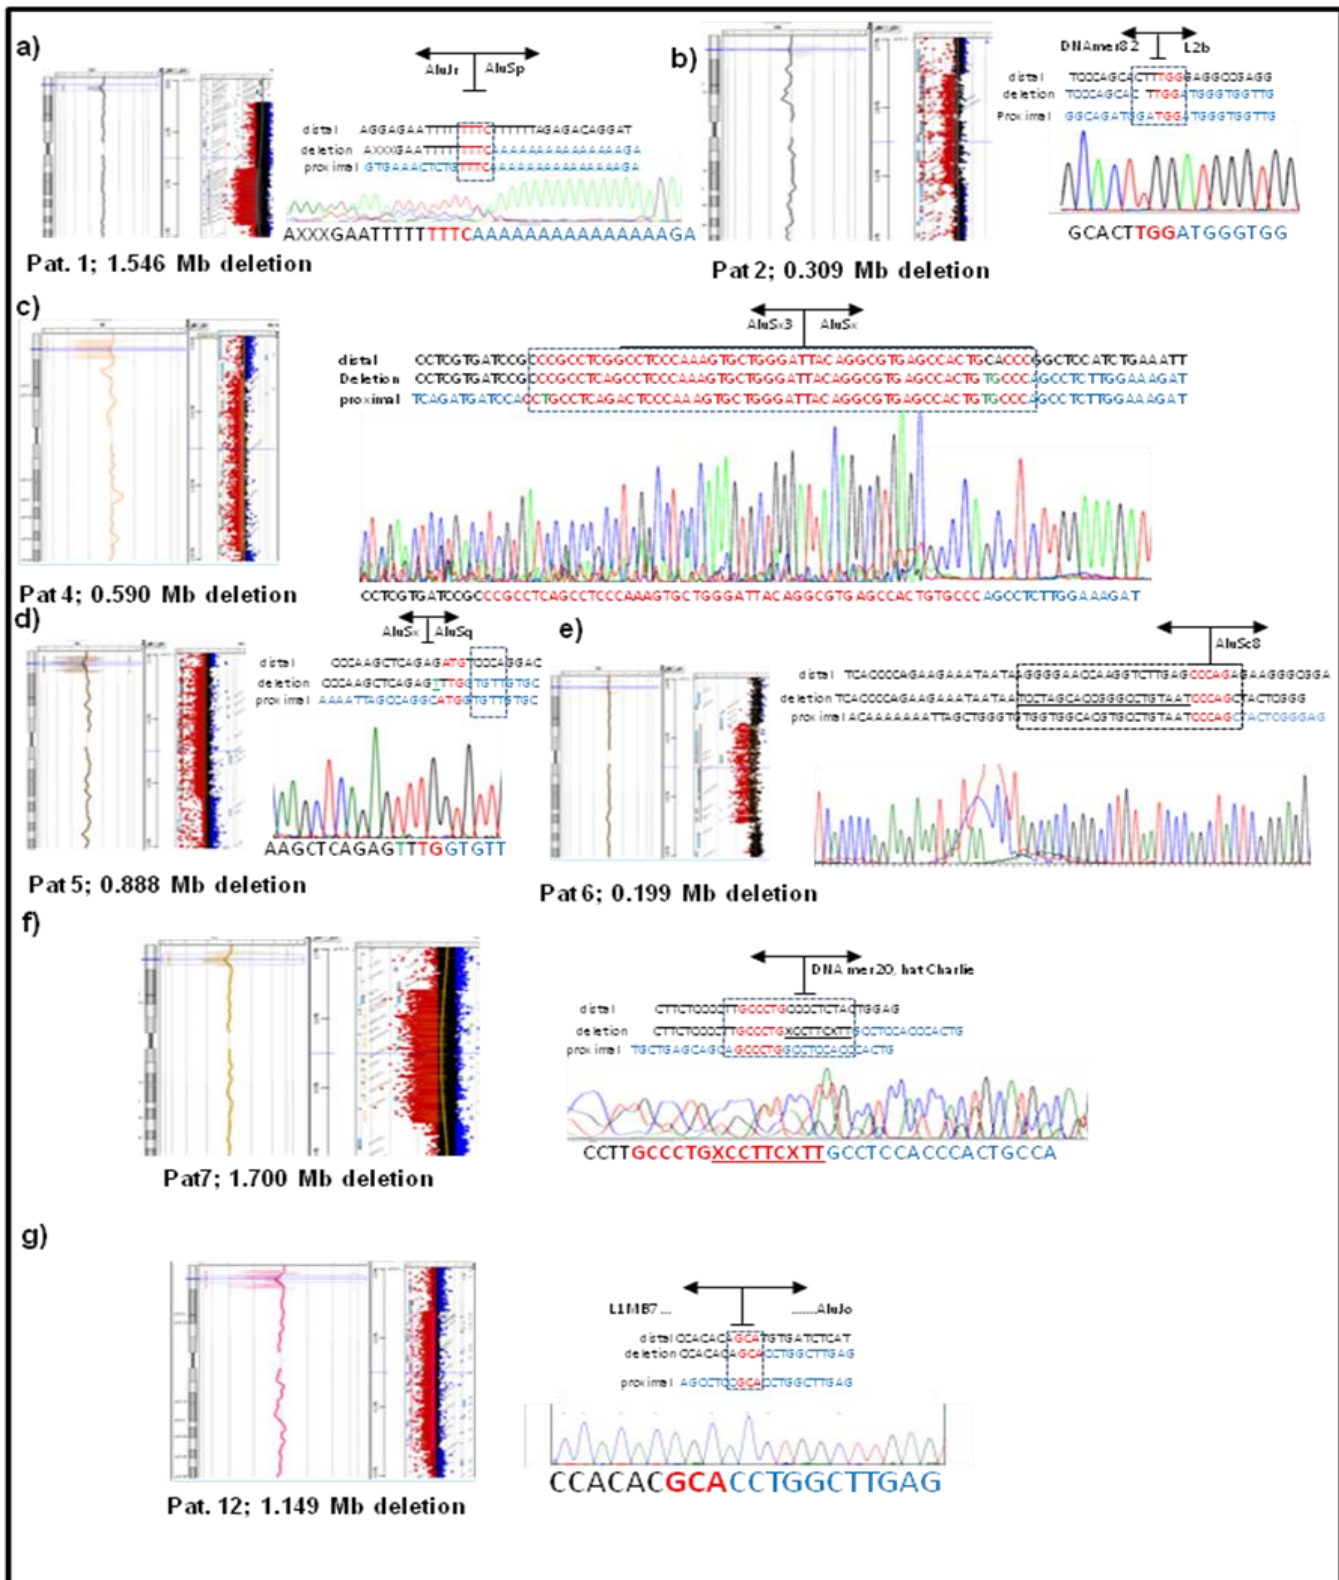

**Figure S2. Delimitation of breakpoints for deletions at interstitial 19p13.3 region.** Patient 1 (a), patient 2 (b), patient 4 (c), patient 5 (d), patient 6 (e), patient 7 (f) and patient 12 (g) using a 19p13.3 custom oligo aCGH (see above), long-range PCR and Sanger sequencing in an ABI 3070 XL. Whole junction fragments were analyzed with BLASTN application (<http://www.ncbi.nlm.nih.gov/BLAST>), University of California Santa Cruz Genome Browser and RepeatMasker application; (<http://www.repeatmasker.org/>).

**Figure S3. Representative examples of complex genomic rearrangements found at the interstitial region 19p13.3.**

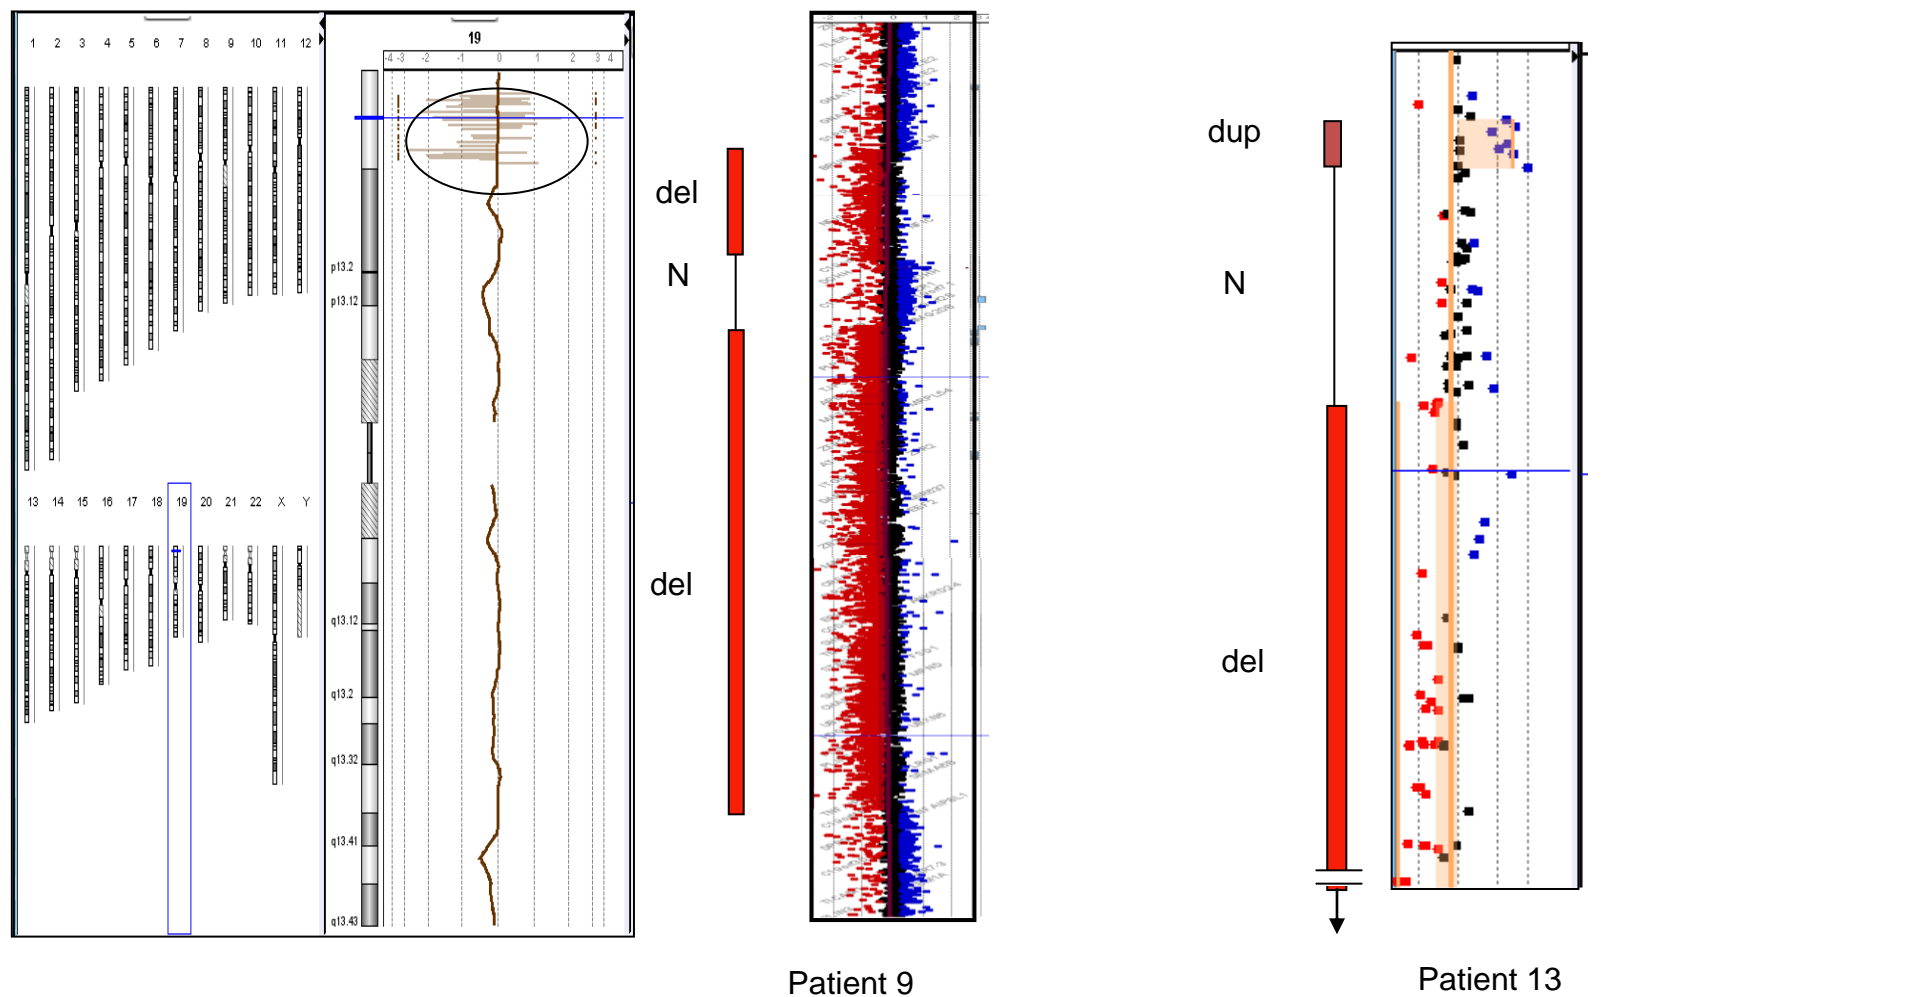

chr19.hg19:g.(3,184,457\_3,190,773)\_(3,448,532\_3,454,848)del  
 ISCN: arr[hg19] 19p13.3 (3,190,773-3,448,532)x1/

chr19.hg19:g.(3,579,614\_3,585,930)\_(4,621,011\_4,627,327)del  
 ISCN: arr[hg19] 19p13.3 (3,585,930-4,621,011)x1 dn

chr19.hg19:g.(3,397,174\_3,403,490)\_(3,405,207\_3,411,524)dup  
 ISCN: arr[hg19] 19p13.3 (3,403,490-3,405,207)x3/

chr19.hg19:g.(3,406,937\_3,413,253)\_(4,195,610\_4,201,926)del  
 ISCN: arr[hg19] 19p13.3 (3,413,253-4,195,610)x1

Figure S4. Molecular analysis of a macrocephaly patient by means of array-CGH.

**Clinical features**

No major dysmorphic features besides macrocephaly; OFC at first referral was >p97; height p50 and weight: p80 at 5 yrs. ASD, seizures. Only sounds, no words

**Previous Genetic analysis.**

FRAX study: negative; Karyotype: negative Subtelomeres-MLPA: negative; RGR-MLPA: negative; NDS1 analysis: negative; PTEN analysis: negative

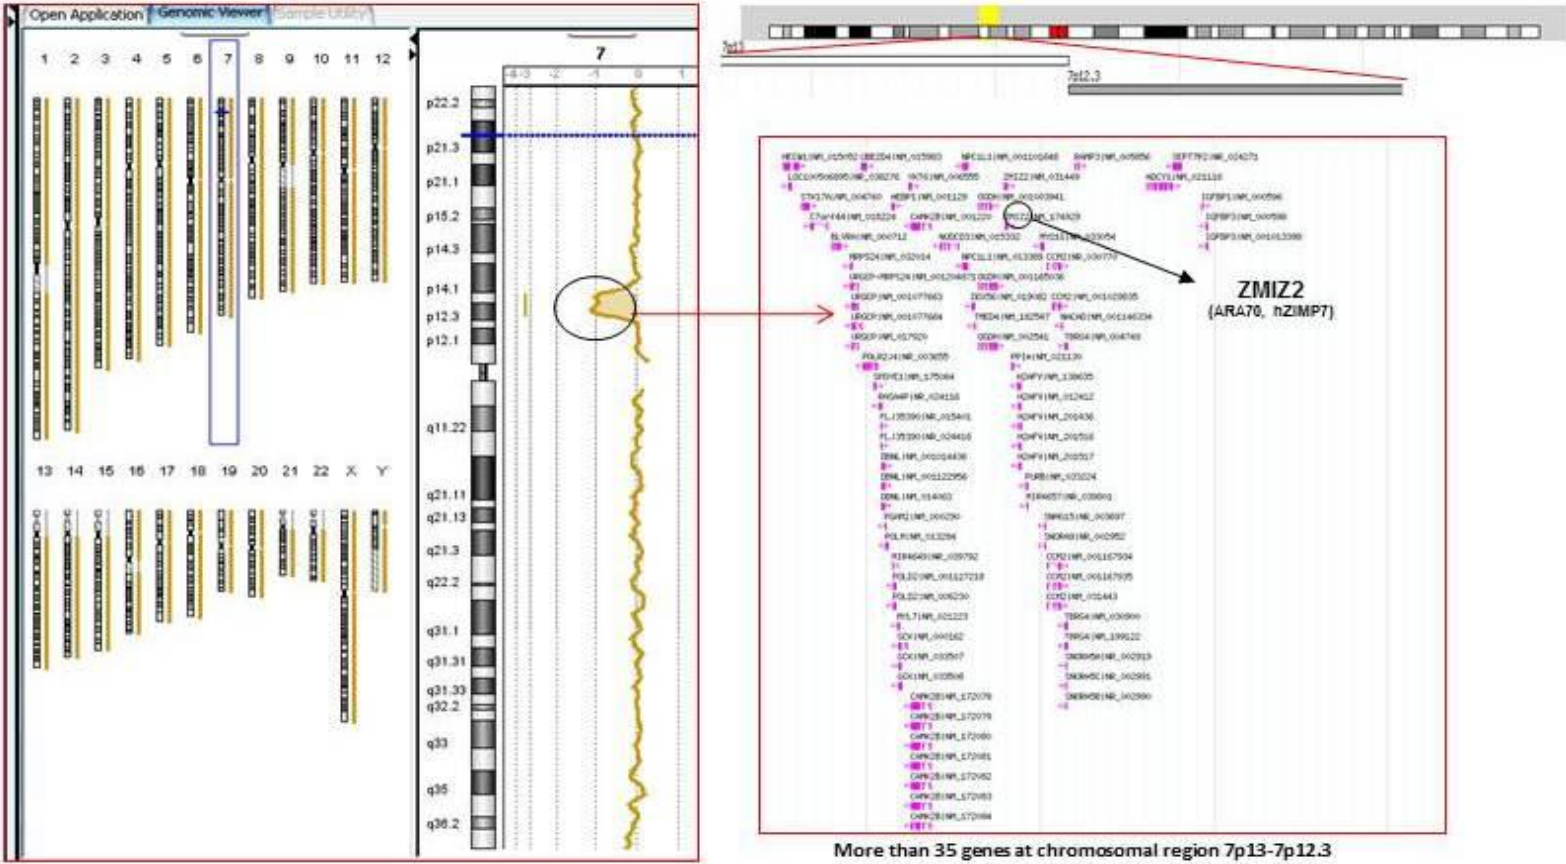

Supplement: ejhg201551x1.pdf [file ejhg201551x1.pdf]
